# Supplementary material for: CRISPR single base editing, neuronal disease modelling and functional genomics for genetic variant analysis: pipeline validation using Kleefstra syndrome EHMT1 haploinsufficiency
Source: PubMed Central journal article supplement (PMC8827184; doi:10.1186/s13287-022-02740-3), 2022-02-09

a

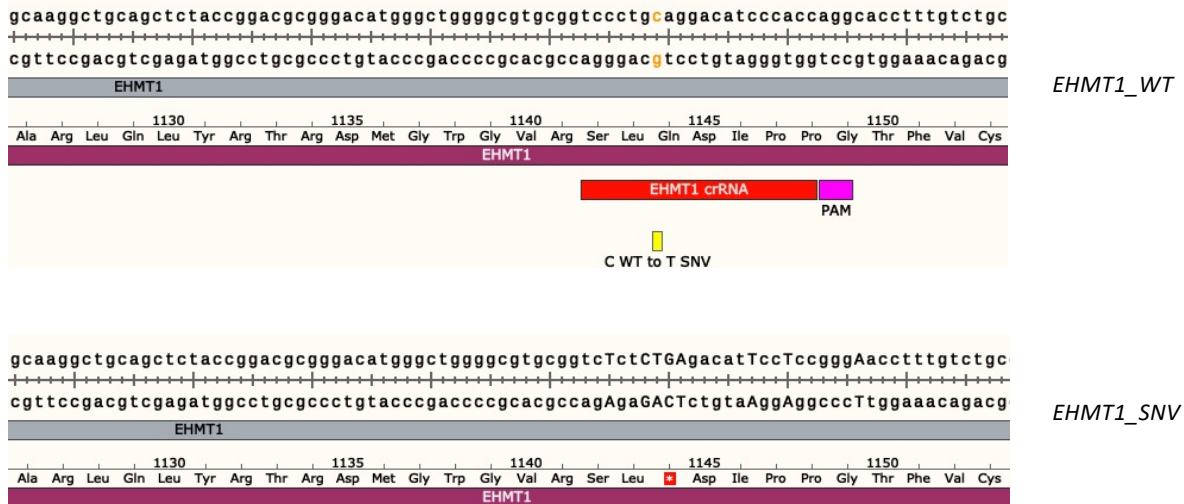

b

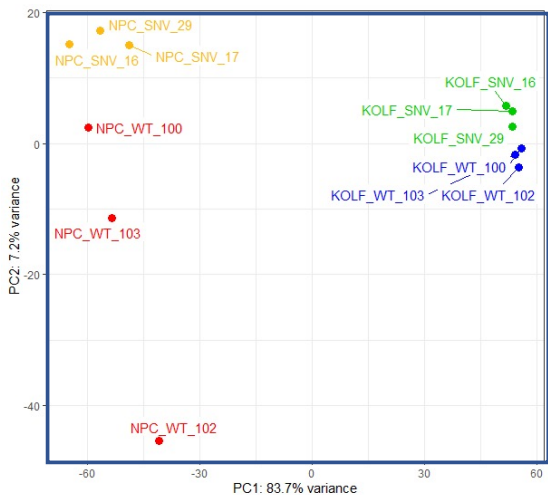

c

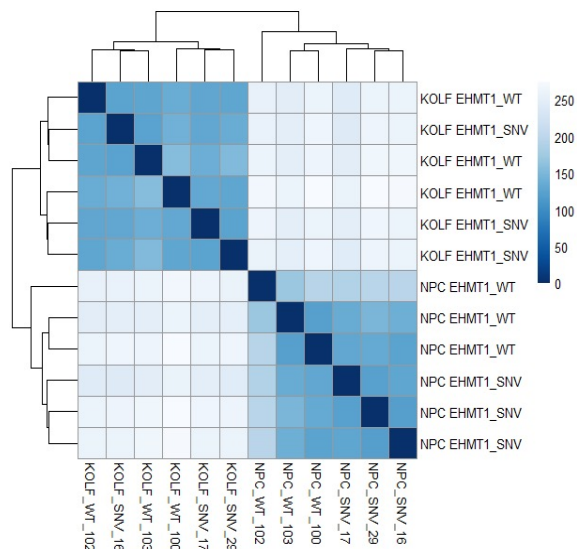

Supplement: 13287_2022_2740_MOESM1_ESM.pdf [file 13287_2022_2740_MOESM1_ESM.pdf]
